# Supplementary material for: Volatilomic insight of head and neck cancer via the effects observed on saliva metabolites
Source: PubMed Central journal article supplement (PMC6286361; doi:10.1038/s41598-018-35854-x), 2018-12-07
Supplement: 41598_2018_35854_MOESM1_ESM.pdf [file 41598_2018_35854_MOESM1_ESM.pdf]

# **Volatilomic insight of head and neck cancer via the effects observed on saliva metabolites**

Ravindra Taware<sup>1</sup>, Khushman Taunk<sup>1</sup>, Jorge A. M. Pereira<sup>2</sup>, Amey Shirolkar<sup>1</sup>, Dharmesh Soneji<sup>3</sup>, José S. Câmara<sup>2,4</sup>, H A Nagarajaram<sup>5,6</sup>, Srikanth Rapole<sup>1\*</sup>

- 1 *Proteomics Lab, National Centre for Cell Science (NCCS), Ganeshkhind, SPPU Campus, Pune 411007, India.*
- 2 *CQM – Centro de Química da Madeira, Universidade da Madeira, Campus Universitário da Penteada, Funchal 9000-390, Portugal.*
- 3 *Malignant Disease Treatment Centre, Military Hospital (Cardio Thoracic Centre), Armed Forces Medical College, Pune 411040, India.*
- 4 *Faculdade de Ciências Exatas e da Engenharia, Universidade da Madeira, Campus Universitário da Penteada, Funchal 9000-390, Portugal.*
- 5 *Laboratory of Computational Biology, Centre for DNA fingerprinting & Diagnostics (CDFD), Nampally, Hyderabad, 500001, India.*
- 6 *Department of Biotechnology & Bioinformatics, School of Life Sciences, University of Hyderabad, Hyderabad 500046, India.*

\*Correspondence:rsrikanth@nccs.res.in

**Table S1:** Qualified VOMs for the statistical analysis

| Sr.No. | VOMs                                   | HMDB        | Average $\pm$ RSD (%)    |                          |
|--------|----------------------------------------|-------------|--------------------------|--------------------------|
|        |                                        |             | Control                  | HNC                      |
| 1      | Hexane, 3-methyl-                      | -           | 209848.23 $\pm$ 96.47    | 853820.59 $\pm$ 91.88    |
| 2      | Pentane, 2,3,3-trimethyl-              | -           | 191113.22 $\pm$ 63.97    | 1671970.07 $\pm$ 99.61   |
| 3      | Acetone                                | HMDB0001659 | 3351820.48 $\pm$ 39.41   | 15638723.05 $\pm$ 238.16 |
| 4      | 2,4-Dimethyl-1-heptene                 | -           | 237582.7 $\pm$ 111.18    | 1488804.54 $\pm$ 143.86  |
| 5      | Ethyl Acetate                          | HMDB0031217 | 1064881.76 $\pm$ 129.01  | 14079238.72 $\pm$ 117.34 |
| 6      | Ethanol                                | HMDB0000108 | 36309995.09 $\pm$ 146.04 | 38804522.44 $\pm$ 114.03 |
| 7      | Propanoic acid, ethyl ester            | HMDB0030058 | 404522.88 $\pm$ 118.31   | 7509760.89 $\pm$ 109.74  |
| 8      | n-Propyl acetate                       | HMDB0034237 | 945487.33 $\pm$ 78.88    | 8575501.09 $\pm$ 131.65  |
| 9      | Acetic acid ethenyl ester              | HMDB0031209 | 1222952.64 $\pm$ 84.94   | 10507797.18 $\pm$ 140.99 |
| 10     | Octane, 3,3-dimethyl-                  | -           | 211910.53 $\pm$ 81.48    | 983328.71 $\pm$ 183.41   |
| 11     | Decane, 4-methyl-                      | HMDB0037268 | 456727.94 $\pm$ 81.82    | 1160677.32 $\pm$ 152.03  |
| 12     | Toluene                                | HMDB0034168 | 343831.92 $\pm$ 42.5     | 753127.68 $\pm$ 83.26    |
| 13     | 1-Propanol                             | HMDB0000820 | 466599.95 $\pm$ 76.43    | 4373368.47 $\pm$ 230.32  |
| 14     | Propanoic acid, propyl ester           | HMDB0030059 | 106081.97 $\pm$ 232.7    | 390329.45 $\pm$ 119.44   |
| 15     | 2,3-Pentanedione                       | HMDB0031598 | 263913.68 $\pm$ 223.78   | 924131.12 $\pm$ 169.22   |
| 16     | 1-Dodecanol, 3,7,11-trimethyl-         | -           | 73733.76 $\pm$ 66.78     | 154410.55 $\pm$ 100.16   |
| 17     | Ethylbenzene                           | HMDB0059905 | 354487.92 $\pm$ 85.16    | 1038314.92 $\pm$ 146.54  |
| 18     | o-Xylene                               | HMDB0059851 | 321011.72 $\pm$ 51.78    | 3012362.93 $\pm$ 196.3   |
| 19     | p-Xylene                               | HMDB0059924 | 964804.89 $\pm$ 59.42    | 2251679.5 $\pm$ 223.64   |
| 20     | 3-Decen-2-ol, (E)-                     | -           | 268795.62 $\pm$ 60.32    | 135551.41 $\pm$ 94.8     |
| 21     | 1-Butanol                              | HMDB0004327 | 1298337.01 $\pm$ 69.29   | 7181423.66 $\pm$ 116.09  |
| 22     | Styrene                                | HMDB0034240 | 250922.15 $\pm$ 33.25    | 1504878.04 $\pm$ 128.11  |
| 23     | p-Cymene                               | HMDB0005805 | 2090312.9 $\pm$ 197.4    | 5326832.7 $\pm$ 276.12   |
| 24     | o-Cymene                               | HMDB0037050 | 1944846.71 $\pm$ 209.54  | 5732404.56 $\pm$ 270.54  |
| 25     | 2-Propanol, 1-chloro-                  | -           | 147589.86 $\pm$ 43.86    | 723037.44 $\pm$ 108.7    |
| 26     | 2-Butanol, 1-chloro-                   | -           | 367962.15 $\pm$ 53.88    | 1287853.26 $\pm$ 89.51   |
| 27     | Propane, 1,2,3-trichloro-2-methyl-     | -           | 212430.68 $\pm$ 79.7     | 365165.77 $\pm$ 67.78    |
| 28     | Benzene, 1,3-bis(1,1-dimethylethyl)-   | HMDB0061923 | 604897.71 $\pm$ 36.95    | 1179780.98 $\pm$ 130.35  |
| 29     | Benzene, 4-ethenyl-1,2-dimethyl-       | -           | 446632.14 $\pm$ 91.48    | 710440.6 $\pm$ 203.97    |
| 30     | Benzene, 1,4-dichloro-                 | HMDB0041971 | 3504114.66 $\pm$ 62.53   | 772987.67 $\pm$ 59.09    |
| 31     | 2-Decanone                             | HMDB0031409 | 73567.04 $\pm$ 57.74     | 1284990.33 $\pm$ 255.48  |
| 32     | Acetic acid                            | HMDB0000042 | 2556000.42 $\pm$ 199.26  | 143445221 $\pm$ 94.21    |
| 33     | Furfural                               | HMDB0032914 | 419308.54 $\pm$ 119.08   | 793543.96 $\pm$ 152.71   |
| 34     | 3-Furaldehyde                          | -           | 434106.25 $\pm$ 119.76   | 829336.12 $\pm$ 153.07   |
| 35     | Benzaldehyde                           | HMDB0006115 | 568686.25 $\pm$ 36.84    | 2588791.95 $\pm$ 247.25  |
| 36     | Propanoic acid                         | HMDB0000237 | 21980444.65 $\pm$ 84.44  | 79486430.6 $\pm$ 140.58  |
| 37     | Propane, 1,1,3,3-tetrachloro-2-methyl- | -           | 619791.68 $\pm$ 57.92    | 567746.58 $\pm$ 65.34    |
| 38     | Propanoic acid, 2-methyl-              | HMDB0001873 | 1207095.5 $\pm$ 65.95    | 64107237.3 $\pm$ 116.29  |
| 39     | 3-Pentenoic acid, 4-methyl-            | -           | 268798.91 $\pm$ 62.04    | 544092.85 $\pm$ 109.46   |
| 40     | 2-Propenoic acid                       | HMDB0031647 | 877833.37 $\pm$ 27.7     | 1110269.42 $\pm$ 72.8    |

|    |                                     |             |                   |                    |
|----|-------------------------------------|-------------|-------------------|--------------------|
| 41 | Benzaldehyde, 3-methyl-             | HMDB0029637 | 61377.29±113.32   | 155555.68±139.61   |
| 42 | 2-Propanol, 1,3-dichloro-           | -           | 547578.47±52.91   | 850767.71±102.91   |
| 43 | Pentanoic acid, 4-methyl-           | HMDB0000689 | 1534761.63±147.25 | 83352927.25±164.68 |
| 44 | Butane, 1,2,3,4-tetrachloro-        | -           | 143350.8±32.93    | 102692.46±77.42    |
| 45 | Phenol                              | HMDB0000228 | 10639988.87±80.78 | 93602196.9±122.65  |
| 46 | 1,2-Decanediol                      | -           | 41547889.13±51.01 | 5220566.88±130.81  |
| 47 | p-Cresol                            | HMDB0001858 | 268855.84±128.9   | 5399673.03±194.56  |
| 48 | Phenol, 2,5-bis(1,1-dimethylethyl)- | -           | 3279454.57±118.51 | 599498.44±92.22    |

**Table S2:** VOMs identified by Wilcoxon-rank sum test and their respective log<sub>2</sub> fold changes.

| Sr. No. | Compound Name                          | HMDB        | p-value  | FDR      | Log <sub>2</sub> FC | Chemical class     |
|---------|----------------------------------------|-------------|----------|----------|---------------------|--------------------|
| 1       | Benzene, 1,4-dichloro-                 | HMDB0041971 | 5.77E-11 | 2.77E-09 | -4.46               | Benzene derivative |
| 2       | 1,2-Decanediol                         | -           | 7.48E-09 | 1.79E-07 | -2.60               | Alcohol            |
| 3       | Phenol, 2,5-bis(1,1-dimethylethyl)-    | -           | 8.32E-08 | 1.33E-06 | -4.77               | Phenol derivative  |
| 4       | 3-Decen-2-ol, E-                       | -           | 4.28E-07 | 5.13E-06 | -2.34               | Alcohol            |
| 5       | Propanoic acid, ethyl ester            | HMDB0030058 | 1.06E-06 | 1.02E-05 | 3.38                | Organic acid       |
| 6       | Acetic acid                            | HMDB0000042 | 3.55E-06 | 2.84E-05 | 3.67                | Organic acid       |
| 7       | Propanoic acid                         | HMDB0000237 | 1.71E-05 | 0.000117 | -1.36               | Organic acid       |
| 8       | 2,4-Dimethyl-1-heptene                 | -           | 4.78E-05 | 0.000277 | 2.10                | Alkene             |
| 9       | Ethyl Acetate                          | HMDB0031217 | 0.000109 | 0.000524 | 1.86                | Acid ester         |
| 10      | 2-Propenoic acid                       | HMDB0031647 | 0.000135 | 0.000587 | -0.81               | Organic acid       |
| 11      | Pentane, 2,3,3-trimethyl-              | -           | 0.000333 | 0.001229 | 3.17                | Alkane             |
| 12      | Ethanol                                | HMDB0000108 | 0.000674 | 0.002245 | -1.00               | Alcohol            |
| 13      | p-Cresol                               | HMDB0001858 | 0.000701 | 0.002245 | 4.75                | Phenol derivative  |
| 14      | p-Xylene                               | HMDB0059924 | 0.000759 | 0.002276 | 0.95                | Hydrocarbon        |
| 15      | Propanoic acid, propyl ester           | HMDB0030059 | 0.000853 | 0.002409 | 1.97                | Organic acid       |
| 16      | Butane, 1,2,3,4-tetrachloro-           | -           | 0.001216 | 0.003242 | -0.81               | Alkane             |
| 17      | Hexane, 3-methyl-                      | -           | 0.002044 | 0.005164 | 1.97                | Hydrocarbon        |
| 18      | 2-Propanol, 1-chloro-                  | -           | 0.002764 | 0.006318 | 1.74                | Alcohol            |
| 19      | 2-Propanol, 1,3-dichloro-              | -           | 0.003796 | 0.008283 | -0.89               | Alcohol            |
| 20      | 2-Butanol, 1-chloro-                   | -           | 0.005423 | 0.011318 | 1.08                | Alcohol            |
| 21      | Benzaldehyde, 3-methyl-                | HMDB0029637 | 0.005746 | 0.011493 | 0.69                | Aldehyde           |
| 22      | Propane, 1,1,3,3-tetrachloro-2-methyl- | -           | 0.006406 | 0.0123   | -1.09               | Alkane             |
| 23      | 1-Propanol                             | HMDB0000820 | 0.007012 | 0.012945 | 1.89                | Alcohol            |
| 24      | Benzene, 1,3-bis(1,1-dimethylethyl)-   | HMDB0061923 | 0.009018 | 0.016031 | 0.80                | Benzene derivative |
| 25      | 2-Decanone                             | HMDB0031409 | 0.011136 | 0.01909  | 5.01                | Ketone             |
| 26      | o-Cymene                               | HMDB0037050 | 0.021877 | 0.03621  | 0.83                | Benzene derivative |
| 27      | 1-Dodecanol, 3,7,11-trimethyl-         | -           | 0.028416 | 0.045466 | 0.92                | Alcohol            |

Supplementary Figure 1:

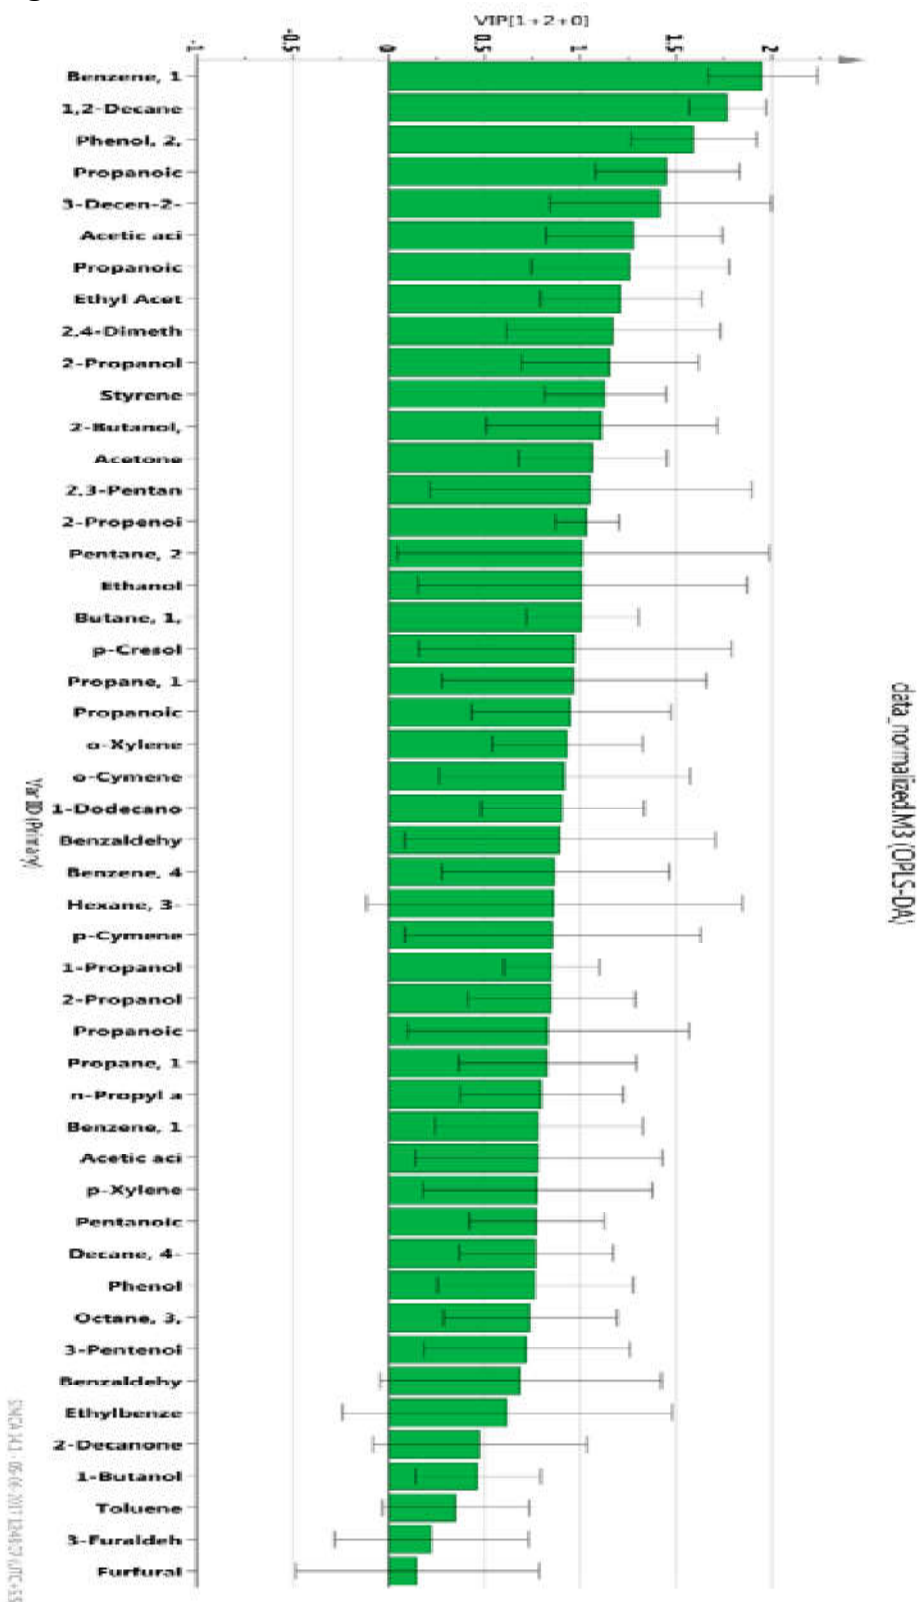

**Figure S1:** Variable Important in Projection (VIP) extracted from the Orthogonal Projections to Latent Structures - Discriminant Analysis score plot (OPLS-DA). VIP score of >1 used to select the VOMs contributing significantly to the class separation in the score plot of OPLS-DA.

**Table S3:** Validation of VOMs by matching fragmentation pattern and Kovats index.

| <b>Sr. No.</b> | <b>Compound</b>        | <b>HMDB</b> | <b>Fragmentation (experimental)</b> | <b>Fragmentation (observed)</b> | <b>KI (exp)</b> | <b>KI (teo)</b> |
|----------------|------------------------|-------------|-------------------------------------|---------------------------------|-----------------|-----------------|
| 1              | Benzene, 1,4-dichloro- | HMDB0041971 | 146/148/111/75                      | 146/148/111/75                  | 1372            | 1420            |
| 2              | 1,2-Decanediol         |             | 69/83/55/43                         | 69/83/55/143                    | 1945            | -               |
| 3              | Acetic acid            | HMDB0000042 | 43/45/60/42                         | 43/45/60/42                     | 1396            | 1400            |
| 4              | Propanoic acid         | HMDB0000237 | 74/73/45/57                         | 74/45/73/57                     | 1472            | 1486            |
| 5              | Ethyl Acetate          | HMDB0031217 | 43/61/70/45                         | 43/61/70/45                     | 923             | 920             |
| 6              | 2-Propenoic acid       | HMDB0031647 | 72/55/45/44                         | 72/55/45/44                     | 1568            | -               |
| 7              | Ethanol                | HMDB0000108 | 45/46/43/42                         | 31/45/46/43                     | 948             | 947             |

**Table S4:** Pathway analysis of salivary volatile metabolites of HNC patients.

| <b>Pathway</b>                                | <b>Total<br/>cmpd</b> | <b>Hits (log<sub>2</sub> FC)</b>     | <b>p-value</b> | <b>FDR</b> |
|-----------------------------------------------|-----------------------|--------------------------------------|----------------|------------|
| Propanoate metabolism                         | 35                    | Propionic acid (-1.36) ,Acetone (NS) | 8.87E-08       | 9.76E-07   |
| Glycolysis or Gluconeogenesis                 | 31                    | Ethanol (-1.00), Acetic acid (3.67)  | 4.14E-07       | 2.27E-06   |
| Pyruvate metabolism                           | 32                    | Acetic acid (3.67)                   | 2.70E-06       | 4.95E-06   |
| Sulfur metabolism                             | 18                    | Acetic acid (3.67)                   | 2.70E-06       | 4.95E-06   |
| Selenoamino acid metabolism                   | 22                    | Acetic acid (3.67)                   | 2.70E-06       | 4.95E-06   |
| Taurine and hypotaurine metabolism            | 20                    | Acetic acid (3.67)                   | 2.70E-06       | 4.95E-06   |
| Nicotinate and nicotinamide<br>metabolism     | 44                    | Propionic acid (-1.36)               | 4.44E-06       | 6.98E-06   |
| Synthesis and degradation of ketone<br>bodies | 6                     | Acetone (NS)                         | 0.000126       | 0.000173   |
| Glycerolipid metabolism                       | 32                    | Propyl alcohol (1.89)                | 0.019434       | 0.023753   |
| Tyrosine metabolism                           | 76                    | Phenol (0.69)                        | 0.57944        | 0.63739    |
| Butanoate metabolism                          | 40                    | 1-Butanol (NS)                       | 0.98482        | 0.98482    |

**Table S5:** Demographic and clinical information of study cohort.

| <b>Particulars</b>                         | <b>HNC</b> | <b>Healthy control</b> |
|--------------------------------------------|------------|------------------------|
| Biological Specimen                        | Saliva     | Saliva                 |
| Number of participants (male, female)      | 32 (19,13) | 27 (15,12)             |
| Age, median (range)                        | 60 (36-82) | 55 (33-75)             |
| CaBuccalmucosa, (male, female)             | 9 (7, 2)   | n.a.                   |
| Ca Tongue (male, female)                   | 6 (2, 4)   | n.a.                   |
| Ca Oral cavity (male, female)              | 9 (5, 4)   | n.a.                   |
| Ca Alveolus (male, female)                 | 3 (0, 3)   | n.a.                   |
| Ca Maxilla (male, female)                  | 2 (0, 2)   | n.a.                   |
| CaGingivo labial sulcus (male, female)     | 2 (2, 0)   | n.a.                   |
| Ca Central arch of mandible (male, female) | 1 (1,0)    | n.a.                   |
| Tobacco smoking (male, female)             | 8 (8, 0)   | 8 (8, 0)               |



## Supplementary Figure 2:

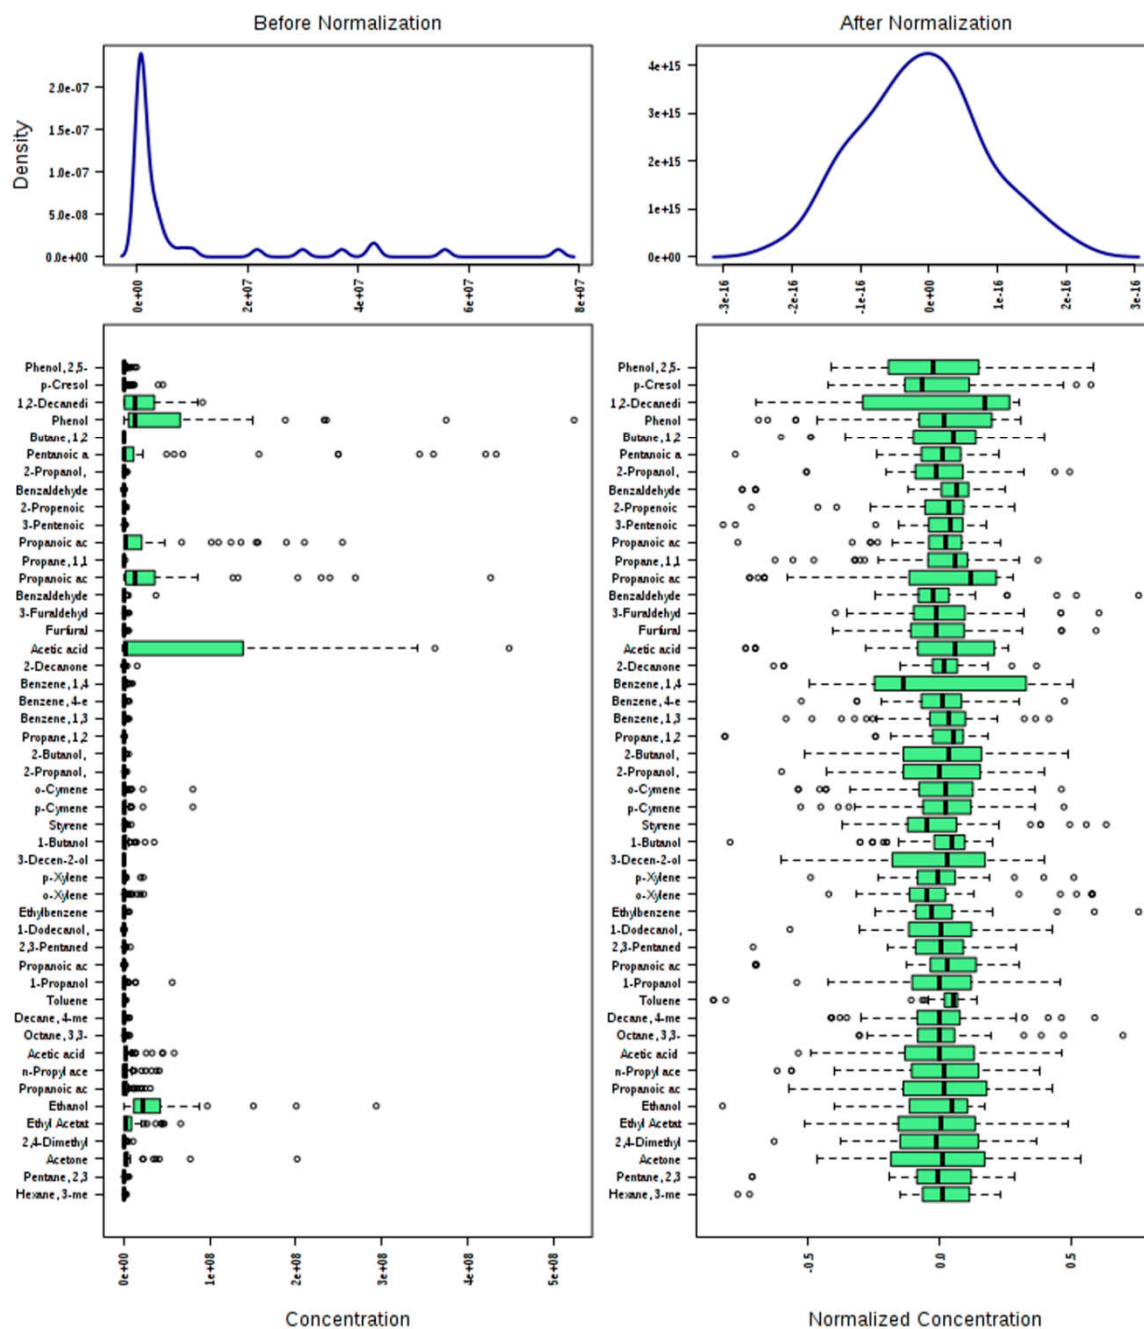

**Figure S2:** Representation of box plot and kernel density plot before and after data normalization. Selected methods: Row-wise normalization: Quantile normalization; Data transformation: Log transformation; Data scaling: Range scaling.

Supplementary Figure 3:

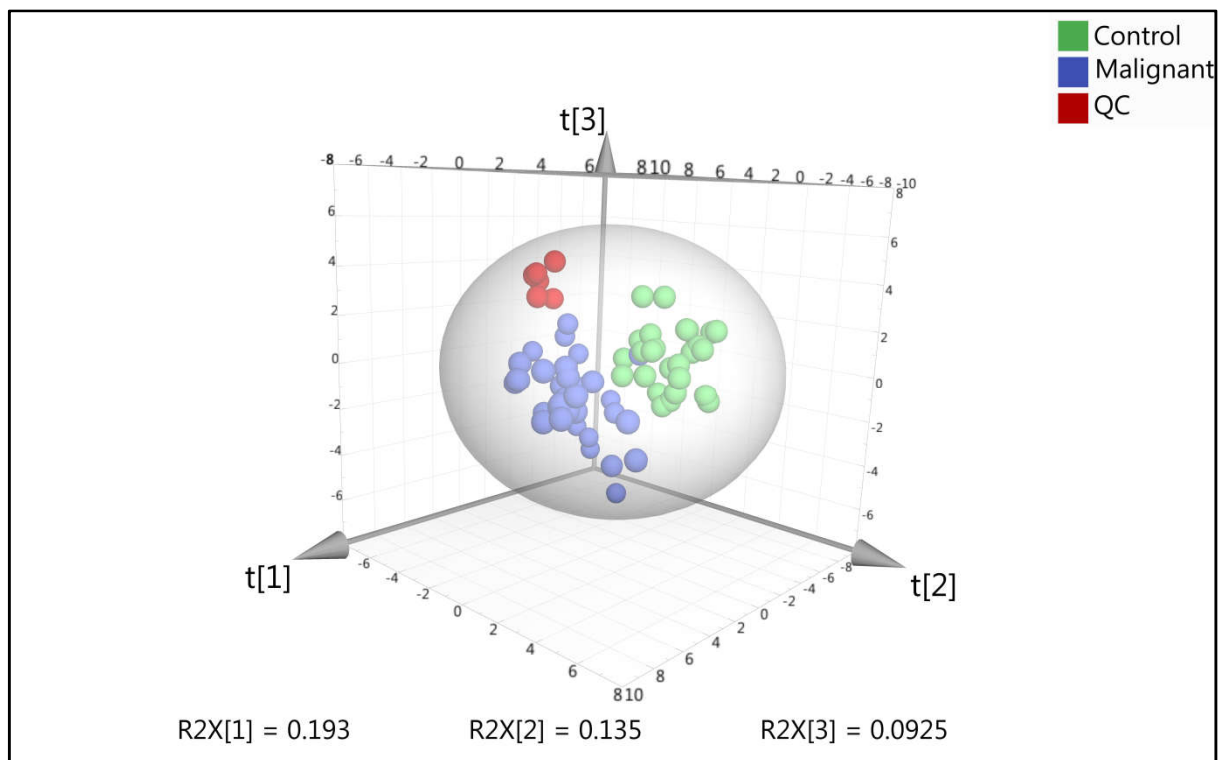

**Figure S3:** 3D graphical representation of PCA plot of QC samples along with control and HNC samples.
